# Supplementary material
Source: PubMed Central journal article supplement (PMC10755830)
Supplement: NEJMc2309215_appendix.pdf [file NEJMc2309215_appendix.pdf]

## Supplementary Appendix

Supplement to: Wang Y, Guo Z, Ye B, et al. Association of SARS-CoV-2 infection during early weeks of gestation with situs inversus. *N Engl J Med* 2023;389:1722-3. DOI: 10.1056/NEJMc2309215

This appendix has been provided by the authors to give readers additional information about the work.

## **Table of contents**

|                                   |   |
|-----------------------------------|---|
| 1) Investigators -----            | 1 |
| 2) Supplementary methods -----    | 3 |
| 3) Figure S1 -----                | 5 |
| 4) Table S1 -----                 | 6 |
| 5) Table S2 -----                 | 7 |
| 6) Supplementary references ----- | 8 |

## Investigators

| Investigators       | Site                                                                                                                                                                                                                                                                                                                                                                                                                                                                           | Authorship        |
|---------------------|--------------------------------------------------------------------------------------------------------------------------------------------------------------------------------------------------------------------------------------------------------------------------------------------------------------------------------------------------------------------------------------------------------------------------------------------------------------------------------|-------------------|
| <b>Yanlin Wang</b>  | Department of Prenatal Diagnosis Center, International Peace Maternity and Child Health Hospital of China Welfare Institute, Shanghai Jiao Tong University School of Medicine, Shanghai, China.                                                                                                                                                                                                                                                                                | Co-first          |
| <b>Zhenming Guo</b> | Institute for Regenerative Medicine, Shanghai East Hospital, Frontier Science Center for Stem Cell Research, School of Life Sciences and Technology, Tongji University, Shanghai, China.                                                                                                                                                                                                                                                                                       | Co-first          |
| <b>Baoying Ye</b>   | Department of Ultrasonography, International Peace Maternity and Child Health Hospital of China Welfare Institute, Shanghai Jiao Tong University School of Medicine, Shanghai, China.                                                                                                                                                                                                                                                                                          |                   |
| <b>Liangjie Liu</b> | Bio-X Institutes, Key Laboratory for the Genetics of Developmental and Neuropsychiatric Disorders, Shanghai Jiao Tong University, Shanghai, China.                                                                                                                                                                                                                                                                                                                             |                   |
| <b>Xiao Mao</b>     | National Health Commission Key Laboratory of Birth Defect Research and Prevention, Hunan Provincial Maternal and Child Health Care Hospital, University of South China, Changsha, China.                                                                                                                                                                                                                                                                                       |                   |
| <b>Yingchun Luo</b> | Department of Ultrasonography, Hunan Provincial Maternal and Child Health Care Hospital, University of South China, Changsha, China.                                                                                                                                                                                                                                                                                                                                           | Co-correspondence |
| <b>Shaorong Gao</b> | Institute for Regenerative Medicine, Shanghai East Hospital, Frontier Science Center for Stem Cell Research, School of Life Sciences and Technology, Tongji University, Shanghai, China.<br><br>Clinical and Translation Research Center of Shanghai First Maternity & Infant Hospital, Frontier Science Center for Stem Cell Research, Shanghai Key Laboratory of Signaling and Disease Research, School of Life Sciences and Technology, Tongji University, Shanghai, China. | Co-correspondence |
| <b>Guang He</b>     | Bio-X Institutes, Key Laboratory for the Genetics of Developmental and Neuropsychiatric Disorders, Shanghai Jiao Tong University, Shanghai, China.<br><br>Shanghai Key Laboratory of Psychotic Disorders, and Brain Science and Technology Research Center, Shanghai Jiao Tong University, Shanghai, China.                                                                                                                                                                    | Co-correspondence |
| <b>Shan Bian</b>    | Institute for Regenerative Medicine, Shanghai East Hospital, Frontier Science Center for Stem Cell Research, School of Life Sciences and                                                                                                                                                                                                                                                                                                                                       | Co-correspondence |

|  |                                                                                                                                                                                                                                                        |  |
|--|--------------------------------------------------------------------------------------------------------------------------------------------------------------------------------------------------------------------------------------------------------|--|
|  | <p>Technology, Tongji University, Shanghai, China.</p> <p>National Health Commission Key Laboratory of Birth Defect Research and Prevention, Hunan Provincial Maternal and Child Health Care Hospital, University of South China, Changsha, China.</p> |  |
|--|--------------------------------------------------------------------------------------------------------------------------------------------------------------------------------------------------------------------------------------------------------|--|

## **Supplementary Methods**

### **Methods**

#### **Data source and participants**

To calculate incidence rates of situs inversus, medical records were reviewed from two obstetric centers, the International Peace Maternity and Child Health Hospital of the China Welfare Institute (IPMCH) in Shanghai and the Hunan Provincial Maternal and Child Health Care Hospital (HPM) in Changsha. Both participating hospitals serve as prenatal diagnosis centers, providing maternal care, as well as ultrasound and genetic assessment for patients diagnosed with fetal anomalies by local clinics in their respective provinces. Ultrasound diagnoses of fetal situs inversus from the preceding nine years, spanning January 1, 2014 through December 31, 2022, were collected from these centers to analyze annual incidence rates of situs inversus, situs inversus totalis (with dextrocardia) and partial situs inversus (with levocardia).<sup>1,2</sup> We also collected ultrasound diagnoses of fetal situs inversus from January 1, 2023 through July 31, 2023, to analyze the incidence rates of situs inversus, situs inversus totalis, and partial situs inversus for that time period.

#### **Methods for estimating the gestational age.**

To calculate gestational age, 280 days (40 weeks) after the first day of the last menstrual period (LMP) was estimated as the date of confinement. Ultrasound measurement of crown-rump length (CRL) was used to verify the date of an embryo/fetus at 6 + 0 to 13 + 6 gestational weeks (GW).

#### **Ultrasound diagnosis of fetal situs inversus.**

Prenatal ultrasound examinations were performed following the Pregnancy Health Guidelines published by the National Health Commission of the People's Republic of China and the ISUOD<sup>3,4</sup>, which recommend ultrasound observation at 6 + 0 to 13 + 6, 14 + 0 to 19 + 6, 20 to 24, 25 to 28, 29 to 32, 33 to 36, and 37 to 41 weeks of gestation, or 7-11 exams in total, potentially more for those with situs inversus fetus. Early ultrasound tests are usually performed between 6-13 weeks in order to estimate pregnancy dating and to determine whether the fetus is well developed. In addition, midterm ultrasound screening for developmental abnormalities around 20-24 GW is routinely performed. The ultrasound examiners in the current study each had at least 5 years of experience with fetal ultrasound scans and have earned Prenatal Diagnosis Certificates issued by the Chinese Maternal and Child Health Management Department following specialization training. The diagnosis of situs inversus was independently confirmed by two experienced fetal ultrasound experts. It should also be noted that no significant changes in ultrasound techniques or physician training were made shortly before or during 2023 in either hospital (IPMCH and HPM) in our study.

Among all 56 cases of fetal situs inversus in our study, 40 cases were diagnosed during midterm ultrasound screening for developmental abnormalities (around 20-24 GW), 3 patients were first diagnosed between 12-19 GW, and 13 cases were diagnosed after 27 GW. Among those 13 cases, 3 were first misdiagnosed in local clinics at 20-24 GW and were diagnosed as fetal situs inversus in our obstetric centers during later gestational age, while 10 were diagnosed as fetal situs inversus in their local clinics during their 20-24 GW ultrasound scan and were referred to our obstetric centers for further confirmation at a later gestational age.

### **Statistical analysis**

To calculate the incidence rates of all situs inversus, situs inversus totalis, and partial situs inversus for each year from 2014 through 2022, the numbers of cases from each year were divided by the total number of pregnant women who received ultrasound tests in the hospital within the same year. To calculate all situs inversus, situs inversus totalis, and partial situs inversus rates for the period, spanning January 1, 2023 through July 31, 2023, the number of cases during this time period was divided by the total number of pregnant women who received ultrasound tests in both hospitals during the same period. The incidence rates represent the proportion of cases “per 10,000”.

### **Ethics**

This study was approved by the ethics community of IPMCH (ethical approval number: GKLW 2023-201), HPM (ethical approval number: 202312), and Tongji University (ethical approval number: 2023tjdxsy034).

### **Acknowledgement**

We appreciate the advice and assistance of Dr. Isaac Greenhut PhD, ELS in the revision and language editing of our manuscript.

## Supplementary Figures

### Figure S1

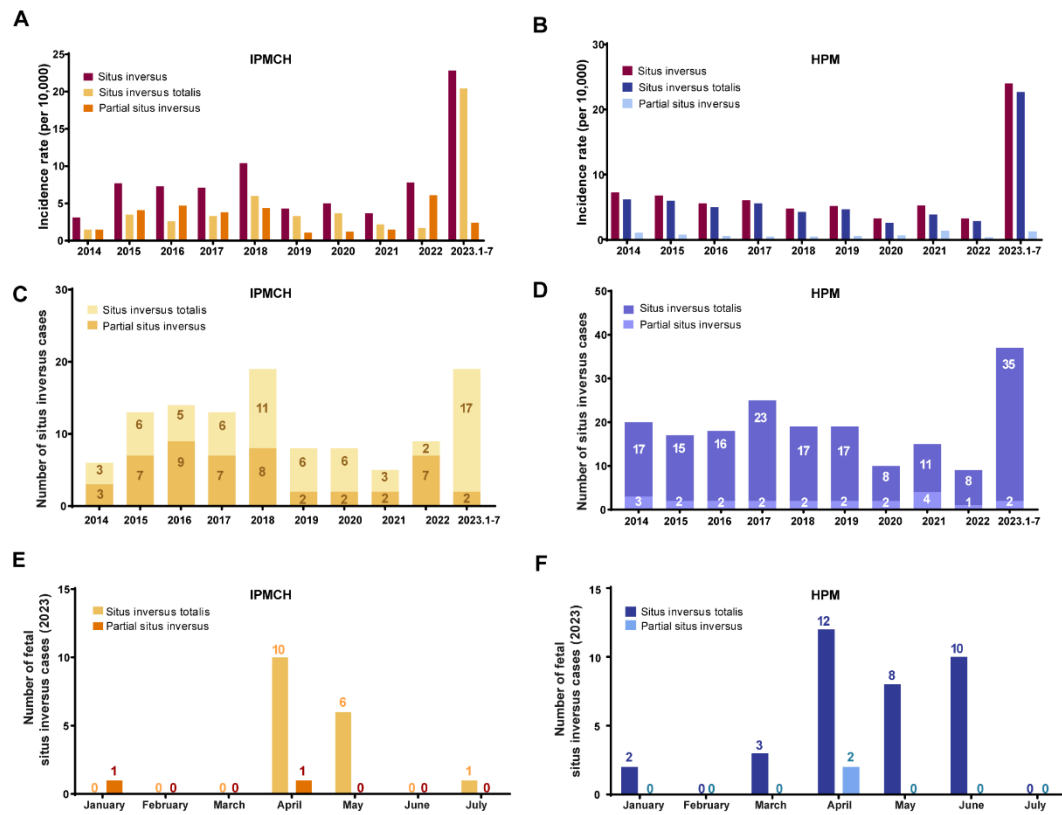

**Figure S1. Incidence rates and case number of situs inversus diagnoses at each center.**

A. Incidence rate from January 2014 through July 2023 at IPMCH.

B. Incidence rate from January 2014 through July 2023 at HPM.

C. Total diagnosed cases of fetal situs inversus from January 2014 through July 2023 at IPMCH.

D. Total diagnosed cases of fetal situs inversus from January 2014 through July 2023 at HPM.

E. Situs inversus cases by month from January 2023 through July 2023 at IPMCH.

F. Situs inversus cases by month from January 2023 through July 2023 at HPM.

Incidence rates are per 10,000 pregnancies screened by ultrasound.

## Supplementary Tables

**Table S1. Number of situs inversus cases per year and incidence rates from 2014 to July 2023.**

| IPMCH                           |                                               |                 |                 |                 | HPM                                           |           |            |            |  |
|---------------------------------|-----------------------------------------------|-----------------|-----------------|-----------------|-----------------------------------------------|-----------|------------|------------|--|
| Year                            | Number of pregnant women receiving ultrasound | SI              | SIT             | SIP             | Number of pregnant women receiving ultrasound | SI        | SIT        | SIP        |  |
| 2014                            | 19433                                         | 6               | 3               | 3               | 27560                                         | 20        | 17         | 3          |  |
| 2015                            | 16968                                         | 13              | 6               | 7               | 25020                                         | 17        | 15         | 2          |  |
| 2016                            | 19049                                         | 14              | 5               | 9               | 31920                                         | 18        | 16         | 2          |  |
| 2017                            | 18226                                         | 13              | 6               | 7               | 40789                                         | 25        | 23         | 2          |  |
| 2018                            | 18215                                         | 19              | 11              | 8               | 39323                                         | 19        | 17         | 2          |  |
| 2019                            | 18447                                         | 8               | 6               | 2               | 36250                                         | 19        | 17         | 2          |  |
| 2020                            | 16038                                         | 8               | 6               | 2               | 30664                                         | 10        | 8          | 2          |  |
| 2021                            | 13502                                         | 5               | 3               | 2               | 28327                                         | 15        | 11         | 4          |  |
| 2022                            | 11490                                         | 9               | 2               | 7               | 27181                                         | 9         | 8          | 1          |  |
| 2023.1-7                        | 8321                                          | 19              | 17              | 2               | 15425                                         | 37        | 35         | 2          |  |
| Incidence rate (per 10,000)     |                                               | <b>SI</b>       | <b>SIT</b>      | <b>SIP</b>      |                                               | <b>SI</b> | <b>SIT</b> | <b>SIP</b> |  |
| 2014                            |                                               | 3.1             | 1.5             | 1.5             |                                               | 7.3       | 6.2        | 1.1        |  |
| 2015                            |                                               | 7.7             | 3.5             | 4.1             |                                               | 6.8       | 6.0        | 0.8        |  |
| 2016                            |                                               | 7.3             | 2.6             | 4.7             |                                               | 5.6       | 5.0        | 0.6        |  |
| 2017                            |                                               | 7.1             | 3.3             | 3.8             |                                               | 6.1       | 5.6        | 0.5        |  |
| 2018                            |                                               | 10.4            | 6.0             | 4.4             |                                               | 4.8       | 4.3        | 0.5        |  |
| 2019                            |                                               | 4.3             | 3.3             | 1.1             |                                               | 5.2       | 4.7        | 0.6        |  |
| 2020                            |                                               | 5.0             | 3.7             | 1.2             |                                               | 3.3       | 2.6        | 0.7        |  |
| 2021                            |                                               | 3.7             | 2.2             | 1.5             |                                               | 5.3       | 3.9        | 1.4        |  |
| 2022                            |                                               | 7.8             | 1.7             | 6.1             |                                               | 3.3       | 2.9        | 0.4        |  |
| 2023.1-7                        |                                               | 22.8            | 20.4            | 2.4             |                                               | 24.0      | 22.7       | 1.3        |  |
| <b>IPMCH+ HPM</b>               |                                               |                 |                 |                 |                                               |           |            |            |  |
| Incidence rate (per 10,000)     |                                               | <b>SI</b>       | <b>SIT</b>      | <b>SIP</b>      |                                               |           |            |            |  |
| 2014                            |                                               | 5.5             | 4.3             | 1.3             |                                               |           |            |            |  |
| 2015                            |                                               | 7.1             | 5.0             | 2.1             |                                               |           |            |            |  |
| 2016                            |                                               | 6.3             | 4.1             | 2.2             |                                               |           |            |            |  |
| 2017                            |                                               | 6.4             | 4.9             | 1.5             |                                               |           |            |            |  |
| 2018                            |                                               | 6.6             | 4.9             | 1.7             |                                               |           |            |            |  |
| 2019                            |                                               | 4.9             | 4.2             | 0.7             |                                               |           |            |            |  |
| 2020                            |                                               | 3.9             | 3.0             | 0.9             |                                               |           |            |            |  |
| 2021                            |                                               | 4.8             | 3.3             | 1.4             |                                               |           |            |            |  |
| 2022                            |                                               | 4.7             | 2.6             | 2.1             |                                               |           |            |            |  |
| 2023.1-7                        |                                               | 23.6            | 21.9            | 1.7             |                                               |           |            |            |  |
| Incidence rate (per 10,000) ±SD |                                               | <b>SI</b>       | <b>SIT</b>      | <b>SIP</b>      |                                               |           |            |            |  |
| From 2014 to 2022               |                                               | <b>5.6 ±1.1</b> | <b>4.0 ±0.9</b> | <b>1.5 ±0.5</b> |                                               |           |            |            |  |
| From Jan.1 to Jul. 31 in 2023   |                                               | <b>23.6</b>     | <b>21.9</b>     | <b>1.7</b>      |                                               |           |            |            |  |
| <b>Increase (fold)</b>          |                                               | <b>4.2</b>      | <b>5.4</b>      | <b>1.1</b>      |                                               |           |            |            |  |

SI, situs inversus; SIT, situs inversus totalis; SIP, partial situs inversus.



**Table S2. Date of diagnosis of fetal situs inversus from two centers in 2023.**

| No.        | Date of diagnosis of SI fetus<br>yyyy/mm/dd | Fetal status |
|------------|---------------------------------------------|--------------|
| Patient 1  | 2023/5/9                                    | SIT          |
| Patient 2  | 2023/1/28                                   | SIT          |
| Patient 3  | 2023/1/28                                   | SIT          |
| Patient 4  | 2023/3/16                                   | SIT          |
| Patient 5  | 2023/3/21                                   | SIT          |
| Patient 6  | 2023/3/27                                   | SIT          |
| Patient 7  | 2023/4/10                                   | SIT          |
| Patient 8  | 2023/4/18                                   | SIT          |
| Patient 9  | 2023/4/18                                   | SIT          |
| Patient 10 | 2023/4/19                                   | SIT          |
| Patient 11 | 2023/4/19                                   | SIT          |
| Patient 12 | 2023/4/21                                   | SIT          |
| Patient 13 | 2023/4/24                                   | SIT          |
| Patient 14 | 2023/4/25                                   | SIP          |
| Patient 15 | 2023/4/27                                   | SIT          |
| Patient 16 | 2023/4/29                                   | SIT          |
| Patient 17 | 2023/5/4                                    | SIT          |
| Patient 18 | 2023/5/9                                    | SIT          |
| Patient 19 | 2023/4/27                                   | SIT          |
| Patient 20 | 2023/4/27                                   | SIT          |
| Patient 21 | 2023/6/21                                   | SIT          |
| Patient 22 | 2023/5/30                                   | SIT          |
| Patient 23 | 2023/6/9                                    | SIT          |
| Patient 24 | 2023/6/1                                    | SIT          |
| Patient 25 | 2023/6/5                                    | SIT          |
| Patient 26 | 2023/6/15                                   | SIT          |
| Patient 27 | 2023/6/19                                   | SIT          |
| Patient 28 | 2023/5/25                                   | SIT          |
| Patient 29 | 2023/6/9                                    | SIT          |
| Patient 30 | 2023/5/30                                   | SIT          |
| Patient 31 | 2023/6/7                                    | SIT          |
| Patient 32 | 2023/5/4                                    | SIT          |
| patient 33 | 2023/5/8                                    | SIT          |
| patient 34 | 2023/4/27                                   | SIT          |
| patient 35 | 2023/6/5                                    | SIT          |
| patient 36 | 2023/6/12                                   | SIT          |
| patient 37 | 2023/4/28                                   | SIP          |
| patient 38 | 2023/1/10                                   | SIP          |
| patient 39 | 2023/4/10                                   | SIT          |
| patient 40 | 2023/4/12                                   | SIT          |
| patient 41 | 2023/4/13                                   | SIT          |
| patient 42 | 2023/4/18                                   | SIP          |
| patient 43 | 2023/4/19                                   | SIT          |
| patient 44 | 2023/4/19                                   | SIT          |
| patient 45 | 2023/4/19                                   | SIT          |
| patient 46 | 2023/4/21                                   | SIT          |
| patient 47 | 2023/4/25                                   | SIT          |
| patient 48 | 2023/4/25                                   | SIT          |
| patient 49 | 2023/5/3                                    | SIT          |
| patient 50 | 2023/4/27                                   | SIT          |
| patient 51 | 2023/5/4                                    | SIT          |
| patient 52 | 2023/5/5                                    | SIT          |
| patient 53 | 2023/5/5                                    | SIT          |
| patient 54 | 2023/7/19                                   | SIT          |
| patient 55 | 2023/5/16                                   | SIT          |
| patient 56 | 2023/5/12                                   | SIT          |

Patients 1-37 were from HPM; patients 38-56 were from IPMCH. Patient 14 is associated with manifestations of heterotaxy syndromes, including levovercion, corrected transposition of the great arteries, double outlet right ventricle, pulmonary artery stenosis and ventricular septal defect.

SI, situs inversus; SIT, situs inversus totalis; SIP, partial situs inversus.

### Supplementary references

1. Eitler K, Bibok A, Telkes G. Situs Inversus Totalis: A Clinical Review. *Int J Gen Med* 2022;15:2437–49.
2. Vingerhoets G, Gerrits R, Verhelst H. Atypical Brain Asymmetry in Human Situs Inversus: Gut Feeling or Real Evidence? *Symmetry* 2021;13(4).
3. Salomon L, Alfirevic Z, Bilardo C, et al. ISUOG Practice Guidelines: performance of first-trimester fetal ultrasound scan. *Ultrasound in Obstetrics & Gynecology* 2013;41(1):102–13.
4. Salomon LJ, Alfirevic Z, Berghella V, et al. Practice guidelines for performance of the routine mid-trimester fetal ultrasound scan. *Ultrasound in Obstetrics & Gynecology* 2011;37(1):116–26.
