# Supplementary material
Source: PubMed Central journal article supplement (PMC10755830)
Supplement: NEJMc2309215_disclosures.pdf [file NEJMc2309215_disclosures.pdf]

Shan Bian

**Discloser Identifier:** 1124598

**Disclosure Purpose:** 23-09215

## Summary of Interests

I do not have any interests to disclose at this time.

## Additional Questions

1. **Are there other relationships or activities that readers could perceive to have influenced, or that give the appearance of potentially influencing, what you wrote in the submitted work?**

No.

2. **What is the manuscript title?**

Association of SARS-CoV-2 Infection during Early Gestational Weeks with Situs Inversus

3. **Are you the corresponding author?**

Yes.

- a. **Please list the other authors' names here.**

Yanlin Wang, Zhenming Guo, Baoying Ye, Liangjie Liu, Xiao Mao, Yingchun Luo, Shaorong Gao, Guang He

## Certification

I certify that the information provided in this disclosure is complete and accurate.

Shaorong Gao

**Discloser Identifier:** 736385

**Disclosure Purpose:** 23-09215

## Summary of Interests

I do not have any interests to disclose at this time.

## Additional Questions

1. **Are there other relationships or activities that readers could perceive to have influenced, or that give the appearance of potentially influencing, what you wrote in the submitted work?**

No.

2. **What is the manuscript title?**

Association of SARS-CoV-2 Infection during Early Gestational Weeks with Situs Inversus

3. **Are you the corresponding author?**

Yes.

- a. **Please list the other authors' names here.**

Yanlin Wang, Zhenming Guo, Baoying Ye, Liangjie Liu, Xiao Mao, Yingchun Luo, Guang He, Shan Bian

## Certification

I certify that the information provided in this disclosure is complete and accurate.

Zhenming Guo

**Discloser Identifier:** 1123923

**Disclosure Purpose:** 23-09215

## Summary of Interests

I do not have any interests to disclose at this time.

## Additional Questions

1. **Are there other relationships or activities that readers could perceive to have influenced, or that give the appearance of potentially influencing, what you wrote in the submitted work?**

No.

2. **What is the manuscript title?**

Association of SARS-CoV-2 Infection during Early Gestational Weeks with Situs Inversus

3. **Are you the corresponding author?**

No.

## Certification

I certify that the information provided in this disclosure is complete and accurate.

Guang He

**Discloser Identifier:** 1129035

**Disclosure Purpose:** 23-09215

## Summary of Interests

I do not have any interests to disclose at this time.

## Additional Questions

1. **Are there other relationships or activities that readers could perceive to have influenced, or that give the appearance of potentially influencing, what you wrote in the submitted work?**

No.

2. **What is the manuscript title?**

Association of SARS-CoV-2 Infection during Early Gestational Weeks with Situs Inversus

3. **Are you the corresponding author?**

Yes.

- a. **Please list the other authors' names here.**

Yanlin Wang, Zhenming Guo, Baoying Ye, Liangjie Liu, Xiao Mao, Yingchun Luo, Shaorong Gao, Shan Bian

## Certification

I certify that the information provided in this disclosure is complete and accurate.

liangjie liu

**Discloser Identifier:** 1129038

**Disclosure Purpose:** 23-09215

## Summary of Interests

I do not have any interests to disclose at this time.

## Additional Questions

1. **Are there other relationships or activities that readers could perceive to have influenced, or that give the appearance of potentially influencing, what you wrote in the submitted work?**

No.

2. **What is the manuscript title?**

Association of SARS-CoV-2 Infection during Early Gestational Weeks with Situs Inversus

3. **Are you the corresponding author?**

No.

## Certification

I certify that the information provided in this disclosure is complete and accurate.

Yingchun Luo

**Discloser Identifier:** 1129033

**Disclosure Purpose:** 23-09215

## Summary of Interests

I do not have any interests to disclose at this time.

## Additional Questions

1. **Are there other relationships or activities that readers could perceive to have influenced, or that give the appearance of potentially influencing, what you wrote in the submitted work?**

No.

2. **What is the manuscript title?**

Association of SARS-CoV-2 Infection during Early Gestational Weeks with Situs Inversus

3. **Are you the corresponding author?**

Yes.

- a. **Please list the other authors' names here.**

Yanlin Wang,Zhenming Guo,Baoying Ye,Liangjie Liu,Xiao Mao,Shaorong Gao,Guang He, Shan Bian

## Certification

I certify that the information provided in this disclosure is complete and accurate.

Xiao Mao

**Discloser Identifier:** 1129036

**Disclosure Purpose:** 23-09215

## Summary of Interests

I do not have any interests to disclose at this time.

## Additional Questions

1. **Are there other relationships or activities that readers could perceive to have influenced, or that give the appearance of potentially influencing, what you wrote in the submitted work?**

No.

2. **What is the manuscript title?**

Association of SARS-CoV-2 Infection during Early Gestational Weeks with Situs Inversus

3. **Are you the corresponding author?**

No.

## Certification

I certify that the information provided in this disclosure is complete and accurate.

**Discloser Identifier:** 663610

**Disclosure Purpose:** 23-09215

## Summary of Interests

I do not have any interests to disclose at this time.

## Additional Questions

1. **Are there other relationships or activities that readers could perceive to have influenced, or that give the appearance of potentially influencing, what you wrote in the submitted work?**

No.

2. **What is the manuscript title?**

Association of SARS-CoV-2 Infection during Early Gestational Weeks with Situs Inversus

3. **Are you the corresponding author?**

No.

## Certification

I certify that the information provided in this disclosure is complete and accurate.



Baoying Ye

**Discloser Identifier:** 1129037

**Disclosure Purpose:** 23-09215

## Summary of Interests

I do not have any interests to disclose at this time.

## Additional Questions

1. **Are there other relationships or activities that readers could perceive to have influenced, or that give the appearance of potentially influencing, what you wrote in the submitted work?**

No.

2. **What is the manuscript title?**

Association of SARS-CoV-2 Infection during Early Gestational Weeks with Situs Inversus

3. **Are you the corresponding author?**

No.

## Certification

I certify that the information provided in this disclosure is complete and accurate.
